# Supplementary material
Source: HighWire-hosted journal article supplement (http://dmd.aspetjournals.org/highwire/filestream/68427/field_highwire_adjunct_files/0/Supplemental_72355.pdf)
Supplement: Supplemental_72355.pdf [file Supplemental_72355.pdf]

## **Supplemental data**

### **Drug Metabolism & Disposition**

#### **(Short Communication)**

#### **Title:**

Comparative evaluation of dehydroepiandrosterone sulfate  
(DHEAS) potential to predict hepatic OATP transporter-based  
drug-drug interactions

#### **Authors:**

Kei Nishizawa, Takeo Nakanishi, Ikumi Tamai<sup>1</sup>

#### **Affiliation:**

Faculty of Pharmaceutical Sciences, Institute of Medical, Pharmaceutical and Health  
Sciences, Kanazawa University, Kanazawa, Japan (K.N., T.N., I.T)

### Supplemental Figure 1

**[<sup>3</sup>H]DHEAS uptake by freshly isolated rat hepatocytes in the presence of increasing concentrations of rifampicin**

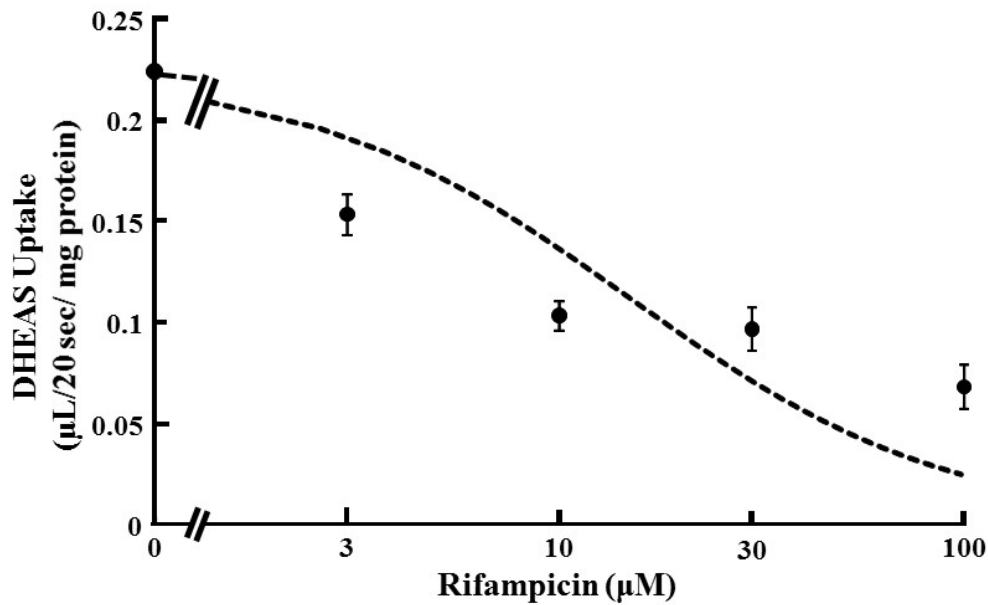

#### Method

Rat hepatocytes were isolated according to the collagenase perfusion method as described previously (Tamai and Tsuji, 1987). After pre-incubation of isolated hepatocytes for 5 min at 37°C with Krebs-Henseleit buffer (KHB: 118 mM NaCl, 4.7 mM KCl, 1.2 mM KH<sub>2</sub>PO<sub>4</sub>, 1.3 mM CaCl<sub>2</sub>, 25 mM NaHCO<sub>3</sub>, 20 mM HEPES), the reaction was started by mixing an equal volume of KHB containing substrate with or without inhibitor. Final cell and substrate concentrations were  $2 \times 10^5$  cells/mL and 2 nM (0.2 μCi/mL), respectively. The inhibitory effect of rifampicin was assessed in terms of the uptake for 20 sec (uptake activity was confirmed to increase linearly up to 20 sec). To terminate the reaction, 100 μL of reaction mixture was transferred into a micro centrifuge tube containing 100 μL silicone layer (silicone oil: liquid paraffin = 3:10) and 100 μL 2 N NaOH, and the samples were stored at room temperature overnight to dissolve the cells. Then, the centrifuge tubes was cut at the boundary of the silicone layer, and the cellular radioactivity was measured with a liquid scintillation counter (LCS-6100; Hitachi Aloka Medical, Tokyo, Japan) after addition of 100 μL 2 N HCl for neutralization and 1 mL Clear-sol scintillation fluid (Nacalai Tesque, Kyoto, Japan). The relative uptake of [<sup>3</sup>H]DHEAS in the presence of increasing concentrations of

rifampicin [I] is given by the following equation, where  $IC_{50}$  is the 50% inhibitory concentration of rifampicin on DHEAS uptake by isolated rat hepatocytes.

$$\% \text{ of control uptake} = \frac{100 \times IC_{50}}{IC_{50} + [I]}$$

The value of  $IC_{50}$  was estimated by means of nonlinear least-squares analysis using the MULTI program (Yamaoka *et al.*, 1981), and was obtained as 3.65  $\mu$ M.

Protein concentration was determined with a protein assay kit (Bio-Rad Richmond, CA, USA) according to the manufacturer's instructions. The bovine serum albumin provided in the kit was used as a standard.

### References:

- Tamai I, Tsuji A (1987) Transport mechanism of cephalexin in isolated hepatocytes. *J Pharmacobiodyn* **10**:632-638.
- Yamaoka K, Tanigawara Y, Nakagawa T, Uno T (1981) A pharmacokinetic analysis program (multi) for microcomputer. *J Pharmacobiodyn* **4**:879-885.

Supplemental Table 1

| Species | Markers         |                      | Rifampicin   |              | AUC | AUC                  |                                  | non treated | rifampicin treated | AUCR | Reference | Symbol |
|---------|-----------------|----------------------|--------------|--------------|-----|----------------------|----------------------------------|-------------|--------------------|------|-----------|--------|
|         | Compounds       | Administration route | Dose (mg/kg) | Dose (mg/mL) |     | Administration route | AUC <sub>last</sub>              |             |                    |      |           |        |
| Monkey  | Pravastatin     | p.o.                 | 2            | 24           |     | p.o.                 | AUC <sub>last</sub>              | 67.1        | 225                | 3.4  | 1         | A      |
|         | Pravastatin     | p.o.                 | 10           | 120          |     | p.o.                 | AUC <sub>last</sub>              | 67.1        | 685                | 10.2 | 1         | A      |
|         | Pravastatin     | p.o.                 | 20           | 240          |     | p.o.                 | AUC <sub>∞</sub>                 | 72          | 1089               | 15.1 | 2         | A      |
|         | Rosuvastatin    | p.o.                 | 2            | 24           |     | p.o.                 | AUC <sub>last</sub>              | 213         | 641                | 3.0  | 1         | B      |
|         | Rosuvastatin    | p.o.                 | 10           | 120          |     | p.o.                 | AUC <sub>last</sub>              | 213         | 2942               | 13.8 | 1         | B      |
|         | Rosuvastatin    | p.o.                 | 18           | 216          |     | p.o.                 | AUC <sub>∞</sub>                 | 0.56        | 2.72               | 4.9  | 3         | B      |
| Human   | Rosuvastatin    | p.o.                 | 15           | 180          |     | p.o.                 | AUC <sub>∞</sub><br>(cross over) | 176         | 439                | 2.9  | 4         | B      |
|         | Pravastatin     | i.v.                 | 20           | 240          |     | p.o.                 | AUC <sub>∞</sub>                 | 412         | 1578               | 3.8  | 2         | A      |
|         | Rosuvastatin    | i.v.                 | 18           | 216          |     | p.o.                 | AUC <sub>∞</sub>                 | 1.88        | 4.99               | 2.7  | 3         | B      |
|         | Pravastatin     | p.o.                 | 10.0         | 370          |     | p.o.                 | AUC <sub>∞</sub><br>(cross over) | 376         | 1989               | 6.4  | 5         | A      |
|         | Pravastatin     | p.o.                 | 10.0         | 370          |     | p.o.                 | AUC <sub>∞</sub>                 | 29          | 157                | 5.4  | 6         | A      |
|         | Pravastatin     | p.o.                 | 10.0         | 370          |     | p.o.                 | AUC <sub>∞</sub>                 | 23.5        | 96.1               | 4.1  | 6         | B      |
| Rat     | Pravastatin     | p.o.                 | 8            | 296          |     | p.o.                 | AUC <sub>∞</sub>                 | 234.1       | 603.2              | 2.6  | 7         | C      |
|         | Pravastatin     | p.o.                 | 10.0         | 370          |     | p.o.                 | AUC <sub>0-8</sub>               | 5.97        | 27.7               | 4.6  | 8         | C      |
|         | Pravastatin     | p.o.                 | 10.0         | 370          |     | i.v.                 | AUC <sub>∞</sub>                 | 29          | 193                | 6.7  | 6         | A      |
|         | Rosuvastatin    | p.o.                 | 10.0         | 370          |     | i.v.                 | AUC <sub>∞</sub>                 | 23.5        | 71.3               | 3.0  | 6         | B      |
|         | Pravastatin     | i.v.                 | 30           | 180          |     | p.o.                 | AUC <sub>∞</sub>                 | 4.99        | 28.3               | 5.7  | 9         | A      |
|         | Rosuvastatin    | i.v.                 | 30           | 180          |     | p.o.                 | AUC <sub>∞</sub>                 | 1.17        | 3.69               | 3.2  | 9         | B      |
| Monkey  | Pravastatin     | i.v.                 | 30           | 180          |     | p.o.                 | AUC <sub>∞</sub>                 | 1.77        | 4.5                | 2.5  | 9         | C      |
|         | DHEAS           | -                    | 2            | 24           |     | p.o.                 | AUC <sub>∞</sub>                 | 550         | 609                | 1.1  | 1         | D      |
|         | DHEAS           | -                    | 10           | 120          |     | p.o.                 | AUC <sub>0-8</sub>               | 530         | 1030               | 1.9  | 1         | D      |
|         | Total Bilirubin | -                    | 18           | 216          |     | p.o.                 | AUC <sub>0-24</sub>              | Fold change |                    | 2.8  | 3         | E      |
|         | CP I            | -                    | 15           | 180          |     | p.o.                 | AUC <sub>0-48</sub>              | 14.2        | 37.6               | 2.6  | 10        | G      |
|         | CP III          | -                    | 15           | 180          |     | p.o.                 | AUC <sub>0-48</sub>              | 5.8         | 20.6               | 3.6  | 10        | H      |
| Human   | Total Bilirubin | -                    | 10.0         | 370.0        |     | p.o.                 | plasma concentration             | 0.87        | 1.51               | 1.7  | 11        | E      |
|         | Bile Acids      | -                    | 12.9         | 477.3        |     | p.o.                 | AUC                              | 21.17       | 66.94              | 3.2  | 12        | F      |
|         | CP I            | -                    | 10.0         | 370.0        |     | p.o.                 | AUC <sub>0-24(+RSV)</sub>        | 20.9        | 84.2               | 4.0  | 13        | G      |
|         | CP III          | -                    | 10.0         | 370.0        |     | p.o.                 | AUC <sub>∞</sub>                 | 3.77        | 12.6               | 3.3  | 13        | H      |
|         | DHEAS           | -                    | 30           | 180          |     | i.v.                 | AUC <sub>∞</sub>                 | 11.38       | 47.96              | 4.2  | x         | D      |
|         | Total Bilirubin | -                    | 20           | 120          |     | i.v.                 | AUC <sub>0-4</sub>               | 1.36        | 3.24               | 2.4  | 14        | E      |
|         | Total Bilirubin | -                    | 5            | 30           |     | i.v.                 | AUC <sub>0-4</sub>               | 1.36        | 1.88               | 1.4  | 14        | F      |

This table summarizes the values plotted in Fig. 2, which were obtained from the cited sources. Reference numbers in Figure 2 and Supplemental Table 1 refer to the following references.

#### References

1. Watanabe M, Watanabe T, Yabuki M, Tamai I (2015) Dehydroepiandrosterone sulfate, a useful endogenous probe for evaluation of drug-drug interaction on hepatic organic anion transporting polypeptide (OATP) in cynomolgus monkeys. *Drug Metab Pharmacokinet* **30**:198-204.
2. Takahashi T, Ohtsuka T, Yoshikawa T, Tatekawa I, Uno Y, Utoh M, Yamazaki H, Kume T, (2013) Pitavastatin as an in vivo probe for studying hepatic organic anion transporting polypeptide-mediated drug-drug interaction in cynomolgus monkeys. *Drug Metab Dispos* **41**: 1875-1882.
3. Chu X, Shih S-J, Shaw R, Hentze H, Chan GH, Owens K, Wang S, Cai X, Newton D, Castro-Perez J, Salituro G, Palamanda J, Fernadis A, Ng CK, Liaw A, Savage MJ, Evers R (2015) Evaluation of cynomolgus monkeys for the identification of endogenous biomarkers for hepatic transporter inhibition and as a translatable model to predict pharmacokinetic interactions with statins in humans. *Drug Metab Dispos* **43**:851-863.
4. Shen H, Yang Z, Mintier G, Han YH, Chen C, Balimane P, Jemal M, Zhao W, Zhang R, Kallipatti S, Selvam S, Sukrutharaj S, Krishnamurthy P, Marathe P, Rodrigues AD (2013) Cynomolgus monkey as a potential model to assess drug interactions involving hepatic organic anion transporting polypeptides: in vitro, in vivo, and in vitro-to-in vivo extrapolation. *J Pharmacol Exp Ther* **344**: 673-685.
5. Chen Y, Zhang W, Huang WH, Tan ZR, Wang YC, Huang X, Zhou HH (2013) Effect of a single-dose of rifampicin on the pharmacokinetics of pitavastatin in healthy volunteers. *Eur J Clin Pharmacol* **69**: 1933-1938.
6. Prueksaritanont T, Chu X, Evers R, Klopfer SO, Caro L, Kothare PA, Dempsey C, Rasmussen S, Houle R, Chan G, Cai X, Valesky R, Frasher IP, Stoch SA (2009) Pitavastatin is a more sensitive and selective organic anion-transporting polypeptide 1B clinical probe than rosuvastatin. *Br J Clin Pharmacol* **78**:587-598.
7. Deng S, Chen XP, Cao D, Yin T, Dai ZY, Tang L, Li YJ (2009) Effect of a concomitant single oral dose of rifampicin on the pharmacokinetics of pravastatin in a two-phase, randomized, single-blind, placebo-controlled, crossover study in healthy Chinese male subjects. *Clin Ther* **31**:1256-1263.
8. Maeda K, Ikeda Y, Fujita T, Yoshida K, Azuma Y, Haruyama Y, Yamane N, Kumagai Y, Sugiyama Y (2011) Identification of the rate-determining process in the hepatic clearance of atorvastatin in a clinical cassette microdosing study. *Clin. Pharmacol. Ther* **90**:575-581.

9. Imaoka T, Mikkaichi T, Abe K, Hirouchi M, Okudaira N, Izumi T (2013) Integrated approach of in vivo and in vitro evaluation of the involvement of hepatic uptake organic anion transporters in the drug disposition in rats using rifampicin as an inhibitor. *Drug Metab Dispos* **41**:1442-1449.
10. Shen H, Dai J, Liu T, Cheng Y, Chen W, Freedden C, Zhang Y, Humphreys WG, Marathe P, Lai Y (2016) Coproporphyrins I and III as functional markers of OATP1B activity: In vitro and in vivo evaluation in preclinical species. *J Pharmacol Exp Ther* **357**:382-393.
11. Capelle P, Dhumeaux D, Mora M, Feldmann G, Berthelot P (1972) Effect of rifampicin on liver function in man. *Gut* **13**:366-371.
12. Galeazzi R, Lorenzini I, Orlandi F (1980) Rifampicin-induced elevation of serum bile acids in man. *Dig Dis Sci* **25**:108-112.
13. Lai Y, Mandlekar S, Shen H, Holenarsipur VK, Langish R, Rajanna P, Murugesan S, Gaud N, Selvam S, Date O, Cheng Y, Shipkova P, Dai J, Humphreys WG, Marathe P (2016) Coproporphyrins in plasma and urine can be appropriate clinical biomarkers to recapitulate drug-drug interactions mediated by OATP inhibition. *J Pharmacol Exp Ther* doi: 10.1124/jpet.116.234914.
14. Watanabe T, Miyake M, Shimizu T, Kamezawa M, Masutomi N, Shimura T, Ohashi R (2015) Utility of bilirubins and bile acids as endogenous biomarkers for the inhibition of hepatic transporters. *Drug Metab. Dispos* **43**:459-466.
